# Supplementary material for: Matrix stiffness triggers chemoresistance through elevated autophagy in pancreatic ductal adenocarcinoma
Source: Royal Society of Chemistry journal article supplement (doi:10.1039/d3bm00598d), 2023-01-01
Supplement: d3bm00598d1.pdf [file d3bm00598d1.pdf]

**Figure. S1 Quantitative immunofluorescence intensity analysis of chemoresistance and autophagy proteins in PANC-1 and MIA-PACA2 cells.**

**Figure. S2 The expression and quantitative analysis of p62 and LC3-II of PANC-1 and MIA-PaCa2 cells.** (A and C) soft and stiff group; (B and D) rescue with RAPA in soft group and CQ in stiff group (DMSO treatment was used as solvent control group).

**Figure. S3 Quantitative analysis of autophagosomes in PANC-1 and MIA-PaCa2 cells.**

**Table. S1** Primer sequence of GAPDH, ABCB1, ABCC1, ABCC3, ABCC10, ABCG2, LC3, BECN1.

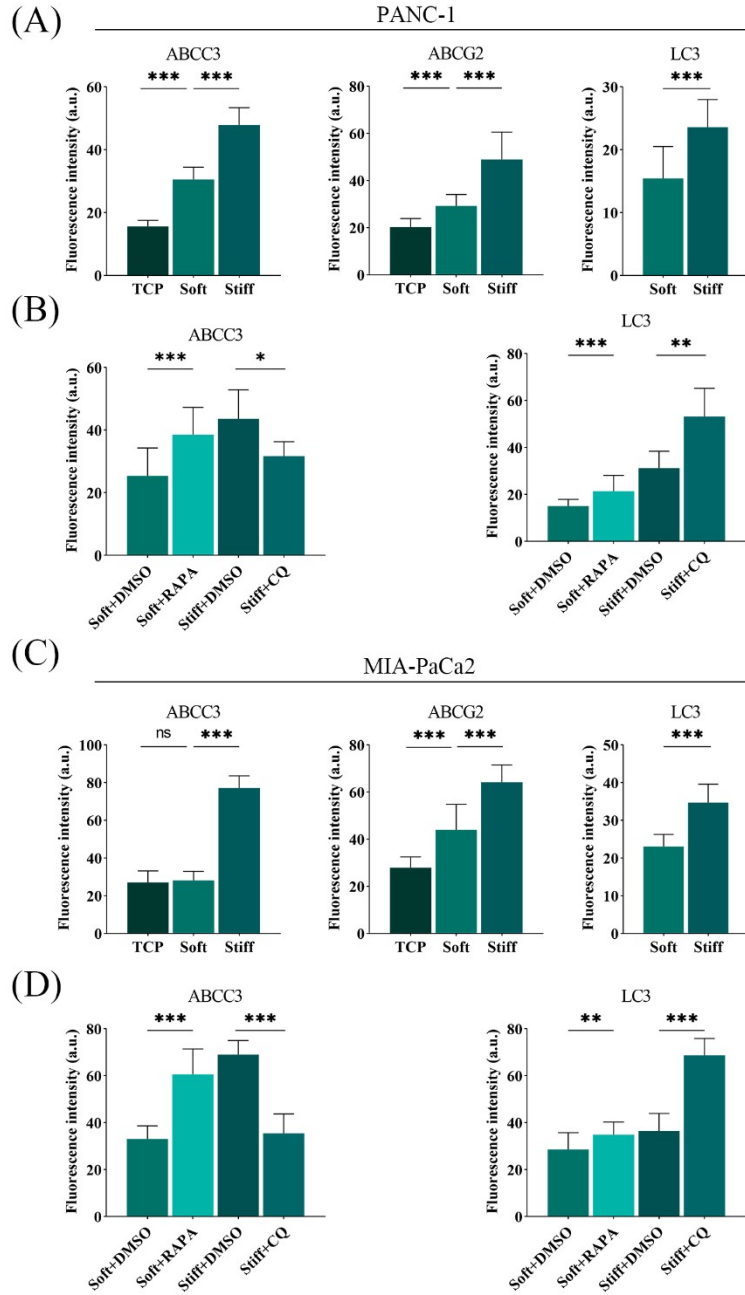

Figure. S1

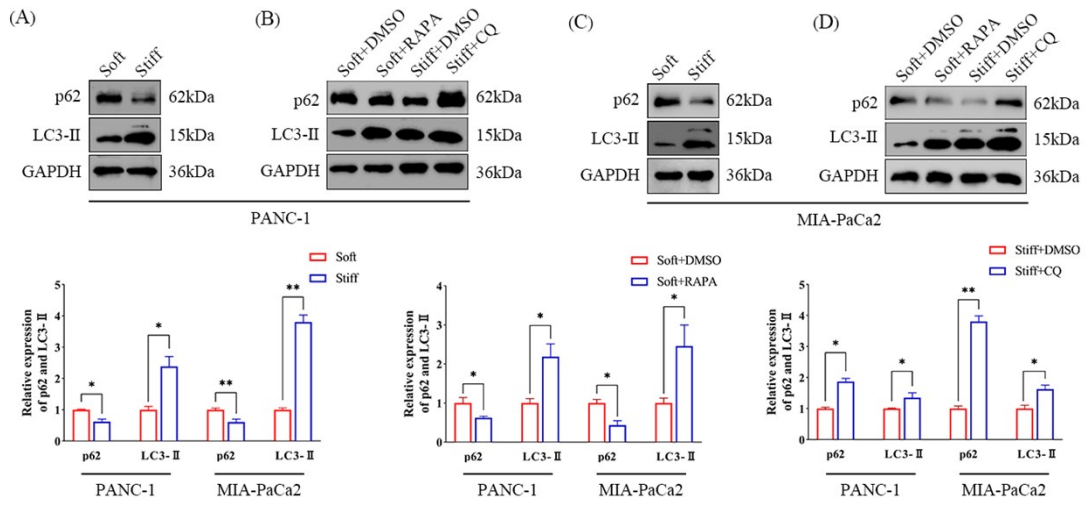

**Figure. S2**

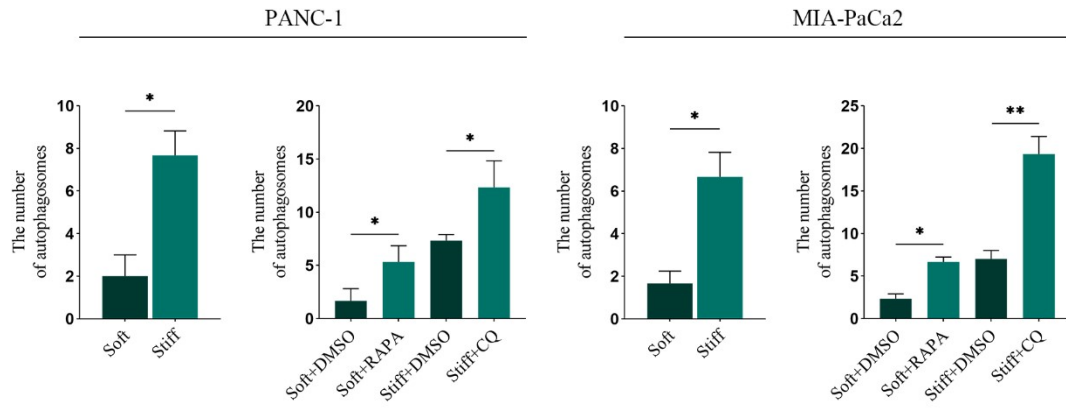

**Figure. S3**

**Table. S1**

| <b>Gene</b>   | <b>Sequence (5' → 3')</b>   | <b>Length</b> |
|---------------|-----------------------------|---------------|
| <b>GAPDH</b>  | F CAGGAGGCATTGCTGATGAT      | 20            |
|               | R GAAGGCTGGGGCTCATT         | 18            |
| <b>ABCB1</b>  | F GCCATAGCTCGTGCCCTTGTTAG   | 23            |
|               | R CGTGCCATGCTCCTTGACTCTG    | 22            |
| <b>ABCC1</b>  | F ATCACCATCATCCCCCAGGA      | 20            |
|               | R TGCAGTCCTCGAACTGTGTC      | 20            |
| <b>ABCC3</b>  | F TCAAGATGGTCCTGGGTGTCCTG   | 23            |
|               | R GATGTAGAAGGTGGTGAAGCGGAAG | 25            |
| <b>ABCC10</b> | F TGGAGGAGGAGCAGAGCACATC    | 22            |
|               | R CAATGGTCGCATACACGGTGAGG   | 23            |
| <b>ABCG2</b>  | F CACCACCTCCTTCTGTCATCAACTC | 25            |
|               | R CACGGCTGAAACACTGCTGAAAC   | 23            |
| <b>LC3</b>    | F GCGAGTTACCTCCCGCAG        | 18            |
|               | R ACCCAGAGGGACAACCCTAA      | 20            |
| <b>BECN1</b>  | F TGTGTTGCTGCTCCATGCTCTG    | 22            |
|               | R ACTGCCTCCTGTGTCTTCAATCTTG | 25            |
